# Supplementary material for: Interactions between TULP3 tubby domain and ARL13B amphipathic helix promote lipidated protein transport to cilia
Source: PubMed Central journal article supplement — Mol Biol Cell. 2023 Feb 21;34(3):ar18. doi: 10.1091/mbc.E22-10-0473 (PMC10011728; doi:10.1091/mbc.e22-10-0473), 2023-02-21

Supplementary Materials  
Molecular Biology of the Cell  
Palicharla *et al.*

## **Supplemental Materials**

Palicharla et al.

Supplemental Information includes key resource table, 7 figures and legends.

## KEY RESOURCE TABLE

| REAGENT OR RESOURCE                                          | SOURCE                                 | IDENTIFIER                          |
|--------------------------------------------------------------|----------------------------------------|-------------------------------------|
| <b>Antibodies and related</b>                                |                                        |                                     |
| Mouse monoclonal anti-Acetylated tubulin                     | Sigma                                  | Cat# T6793<br>RRID: AB_477585       |
| Rabbit polyclonal anti-ARL13B (IF)                           | Tamara Caspary<br>(Emory University)   |                                     |
| Mouse monoclonal anti-ARL13B (IF, WB)                        | NeuroMab Facility                      | Cat# N295B/66<br>RRID: AB_2750771   |
| Chicken anti-GFP (IF)                                        | Abcam                                  | Cat# ab13970<br>RRID: AB_300798     |
| Rabbit polyclonal anti-SMO                                   | Kathryn Anderson<br>(MSKCC)            | (Ocbina and Anderson, 2008)         |
| Rabbit polyclonal anti-TULP3                                 | Peter Jackson<br>(Stanford University) | (Mukhopadhyay et al. 2010)          |
| Rabbit polyclonal anti-GPR161                                | Custom-made                            | (Pal et al. 2016)                   |
| Mouse monoclonal anti-S tag                                  | EMD Millipore                          | Cat# MAC112                         |
| Goat polyclonal anti-Myc tag                                 | Abcam                                  | Cat# ab9132<br>RRID: AB_307033      |
| Rat monoclonal anti-HA                                       | Roche                                  | Cat# 11867423001<br>RRID: AB_390918 |
| Goat polyclonal anti-DDDDK (Flag) tag                        | Abcam                                  | Cat# ab1257<br>RRID: AB_299216      |
| Mouse monoclonal anti-MBP                                    | NEB                                    | Cat# E8032S                         |
| Mouse monoclonal anti-GST                                    | Sigma                                  | Cat# G1160<br>RRID: AB_259845       |
| Rabbit polyclonal anti-ADCY3                                 | LSBio                                  | Cat# LS-C204505                     |
| Rabbit polyclonal anti-AQP2                                  | Sigma                                  | Cat# A7310<br>RRID: AB_476762       |
| Mouse monoclonal anti-AQP2                                   | Santa Cruz                             | Cat# sc-515770<br>RRID: AB_2810957  |
| Rabbit polyclonal anti-INPP5E                                | Proteintech                            | Cat# 17797-1-AP<br>RRID: AB_2167120 |
| Rabbit polyclonal anti-NPHP3                                 | Proteintech                            | Cat# 22026-1-AP<br>RRID: AB_2878975 |
| Rabbit Monoclonal anti-LKB1                                  | CST                                    | Cat# 13031T                         |
| hFAB Rhodamine anti-Tubulin                                  | Bio-Rad                                | Cat# 12004165<br>RRID: AB_2884950   |
| IRDye 680 Streptavidin                                       | LI-COR                                 | Cat# 926-68079                      |
| Alexa Fluor 488-, 594-, 647- conjugated secondary antibodies | Life Technologies                      |                                     |
| IRDye tagged secondary antibodies                            | LI-COR                                 |                                     |
| Hoechst 33342                                                | Life Technologies                      | H3570                               |
| BG-Block                                                     | NEB                                    | S9106                               |
| TMR Star                                                     | NEB                                    | S9105                               |
|                                                              |                                        |                                     |
| <b>Chemicals, Media, and Kits</b>                            |                                        |                                     |
| Penicillin/Streptomycin                                      | Sigma                                  | P4333                               |
| Glutamine                                                    | Sigma                                  | G7513                               |

|                                                         |                                                        |                                      |
|---------------------------------------------------------|--------------------------------------------------------|--------------------------------------|
| Polyfect                                                | Qiagen                                                 | 301105                               |
| PEI-Max                                                 | Polysciences                                           | 24765-2                              |
| DMEM-High Glucose                                       | Sigma                                                  | D5796                                |
| DMEM F12                                                | Sigma                                                  | D6421                                |
| Bovine calf serum                                       | Sigma                                                  | 12133C                               |
| Fetal bovine serum                                      | Sigma                                                  | F0926                                |
| Cosmic serum                                            |                                                        |                                      |
| Paraformaldehyde                                        | Electron microscopy solutions                          | 15710                                |
| Normal donkey serum                                     | Jackson Immuno Research, West Grove, PA                | Cat# 017-000-121<br>RRID: AB_2337258 |
| Fluoromount-G                                           | Southern Biotech                                       | 0100-01                              |
| Permount                                                | ThermoFisher Scientific                                | SP15-100                             |
| Biotin                                                  | Sigma                                                  | Cat# B4639                           |
| GenElute mammalian total RNA purification kit           | Sigma                                                  | RTN350                               |
| DNase I                                                 | Sigma                                                  | D5307                                |
| SYBR Green Quantitative RT-qPCR Kit                     | Sigma                                                  | QR0100                               |
| Kicqstart One-Step Probe RT-qPCR ReadyMix               | Sigma                                                  | KCQS07                               |
| TNT Sp6 high-yield wheat germ protein expression system | Promega                                                | L3261                                |
| Synthetic mounting media                                | Fisher Chemical                                        | SP15                                 |
| Mini-PROTEAN TGX Precast Protein Gels                   | Bio-Rad                                                |                                      |
|                                                         |                                                        |                                      |
| <b>Experimental Models: Organisms</b>                   |                                                        |                                      |
| Mouse: <i>Tulp3<sup>ff</sup></i>                        | MRC, Harwell                                           | (Hwang et al, 2019)                  |
| Mouse: <i>HoxB7-Cre</i>                                 | O'Brien Kidney Research Core of UT Southwestern        |                                      |
| Mouse: <i>Ksp-Cre</i>                                   | O'Brien Kidney Research Core of UT Southwestern        |                                      |
| Mouse: <i>Nestin-Cre</i>                                | JAX                                                    | Stock No. 003771                     |
|                                                         |                                                        |                                      |
| <b>Experimental Models: Cell Lines</b>                  |                                                        |                                      |
| IMCD3 Flp-In                                            | Peter Jackson (Stanford University)                    | (Torres et al, 2009)                 |
| NIH 3T3 Flp-In                                          | Thermo-Fisher                                          | R76107                               |
| 3T3-L1                                                  | Peter Michaely (UT Southwestern)                       |                                      |
| TRex-293 FLP-In                                         | Life Technologies                                      | R78007                               |
| Phoenix A                                               | National Gene Vector Biorepository, Indiana University |                                      |
|                                                         |                                                        |                                      |

|                                                              |                                             |                               |
|--------------------------------------------------------------|---------------------------------------------|-------------------------------|
| <b>Experimental Models: Primary cells</b>                    |                                             |                               |
| <i>Tulp3</i> knockout MEFs                                   | This study                                  |                               |
| <b>Experimental Models: Immortalized MEFs</b>                |                                             |                               |
| <i>Arl13b<sup>hnn</sup></i> MEFs and wild type controls      | Tamara Caspary<br>(Emory University)        | (Larkins et al, 2011)         |
| <i>Arl13b<sup>V358A</sup></i> MEFs and wild type controls    | Tamara Caspary<br>(Emory University)        | (Gigante et al, 2020)         |
| <b>Recombinant DNA</b>                                       |                                             |                               |
| pGLAP5                                                       | Addgene                                     | 19706                         |
| pG-LAP1                                                      | Addgene                                     | 19702                         |
| pENTR223-ARL13B                                              | DNAsu                                       | HsCD00511796                  |
| pENTR221-INPP5E                                              | Life Technologies                           | IOH40212                      |
| NPHP3 (1-203 aa)                                             | GeneArt                                     | Synthesized                   |
| Gateway PLUS shuttle clone for CYS1                          | GeneCopoeia                                 | GC-Y0203-CF                   |
| Gatewaytized LAP1 or LAP5 in pBABE                           | This study                                  |                               |
| pQXIN-Myc-TULP3                                              | This study                                  |                               |
| pQXIN-HA-INPP5E                                              | This study                                  |                               |
| pcDNA5-BirA-FLAG N-DEST                                      | Anne-Claude Gingras                         |                               |
| pcDNA5-BirA-FLAG C-DEST                                      | Anne-Claude Gingras                         |                               |
| pCS2-Myc-DEST                                                |                                             |                               |
| pLenti CRISPR Puromycin                                      |                                             | (Shalem <i>et al.</i> , 2014) |
| GFP-SNAP-ARL13B in pBABE                                     | This study                                  |                               |
| <b>Software and Algorithms</b>                               |                                             |                               |
| ImageJ software                                              | National Institutes of Health, Bethesda, MD |                               |
| GraphPad Prism                                               | GraphPad, La Jolla, CA                      |                               |
| Bio-Rad Image lab software                                   | Bio-Rad                                     |                               |
| <b>Other</b>                                                 |                                             |                               |
| Thermo-Fisher Excelsior Automated Tissue Processor           | ThermoFisher Scientific                     | A82300001                     |
| Paraplast Plus paraffin bath                                 | Leica                                       | 39602004                      |
| Thermo-Shandon Histocenter 2 Embedding Workstation           | ThermoFisher Scientific                     | 6400012D                      |
| Leica stereomicroscope (M165 C) with digital camera (DFC500) | Leica                                       |                               |
| Zeiss stereomicroscope (Discovery.V12)                       | Zeiss                                       |                               |
| Zeiss LSM780 confocal microscope                             | Zeiss                                       |                               |
| Nikon CSU-W1 SoRa                                            | Nikon                                       |                               |
| Leica DM2000 photomicroscope                                 | Leica                                       |                               |
| Sakura DRS-601 x-y-z robotic-stainer                         | Sakura-FineTek, Torrance, CA                | DRS-601                       |
| CFX96 thermocycler                                           | Bio-Rad                                     |                               |
| Superfrost <sup>®</sup> Plus slides                          | Fisher Scientific                           | 12-550-15                     |

**Figure S1 (Related to Figure 1). TULP3 determines ciliary trafficking of ARL13B.**

**(A)** MEFs from wild type or *Tulp3* knockout (ko) mice were serum starved upon confluence for 24 h before fixation. Fixed cells were immunostained for GPR161 (green) along with acetylated tubulin (AcTUB, red) and counterstained for DNA (blue). Quantification shown in Fig. 1B.

**(B-C)** Wildtype and *Tulp3* ko NIH 3T3 cells were grown to confluency and starved further for 48 h to promote ciliation before fixing. The fixed cells were immunostained for Arl13b (green) along with acetylated tubulin (red) and counterstained for DNA. Total counted cells are >200 for each condition (D). Data represent mean  $\pm$  SD.

**(D-E)** Wild type or *Tulp3* knock out 3T3-L1 cells were grown to confluency and further cultured for 72 hours to promote ciliation. The cells were treated with 500 nM Smo agonist (SAG) for 24 hours to induce Smo ciliary localization before fixing. Immunostaining was performed for Smo, Acetylated tubulin and DNA. Arrows indicate cilia positive for Smo while arrow heads indicate Smo negative cilia (E). Smo positive cilia were counted from two experiments (F), and  $n > 100$  cilia were counted for each condition. Data represent mean  $\pm$  SD.

Scale, 5  $\mu$ m. \*\*\*\*,  $p < 0.0001$ ; ns, not significant. Arrows indicate cilia positive for the indicated proteins (Gpr161 (A) or Arl13b (C) or Smo (E)), while arrow heads indicate negative cilia.

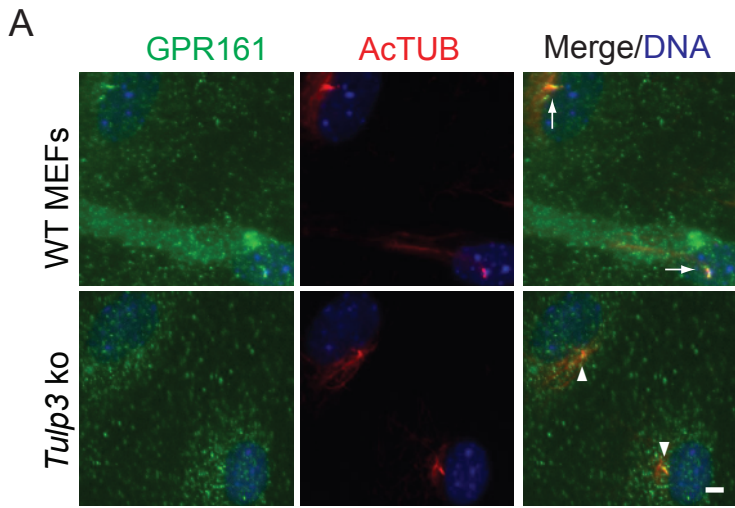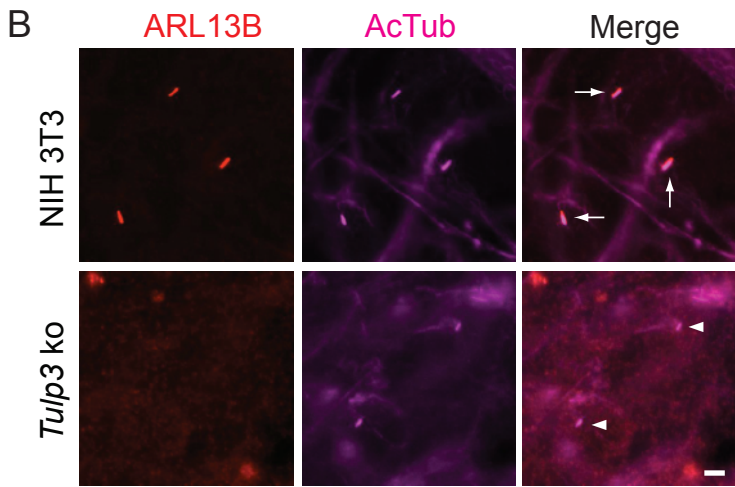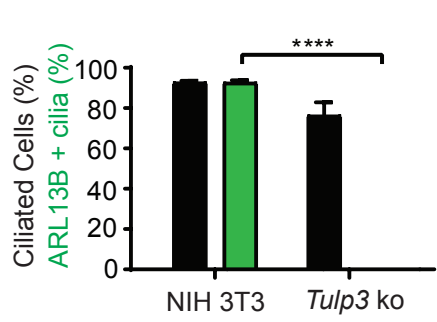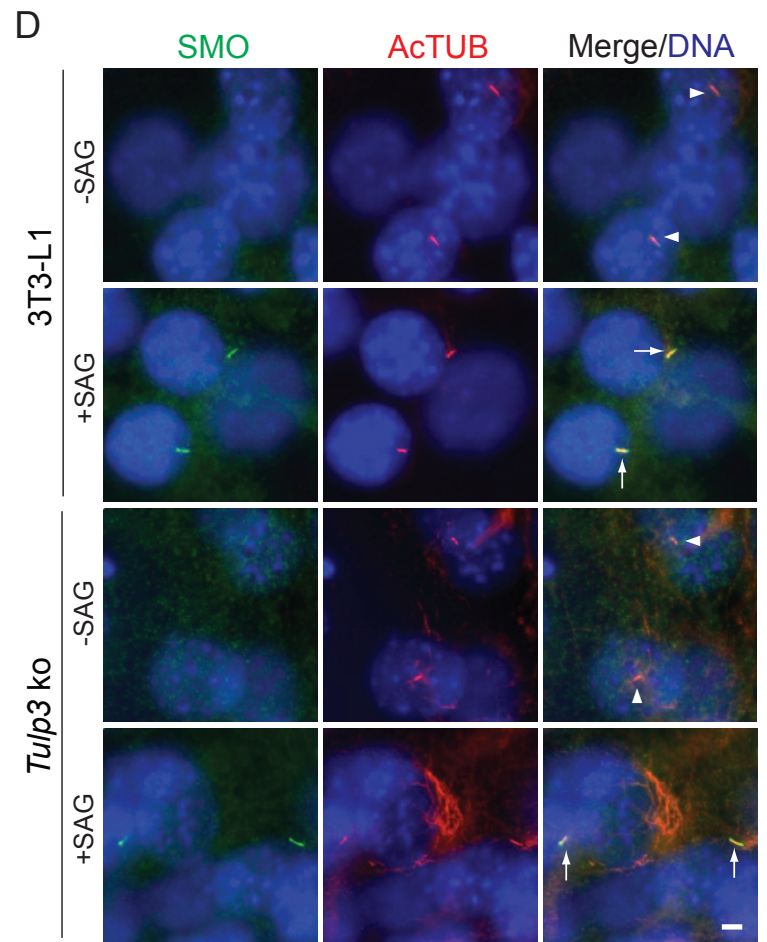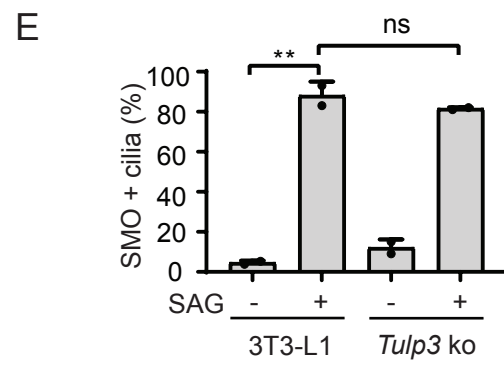

**Figure S2 (Related to Figure 1 and 2). Sequencing data from *Tulp3* ko cell lines.**

- (A) Alleles in the *Tulp3* ko CRISPR lines are shown. CRISPR/Cas9 ko lines were generated using guide RNA targeting sequences targeting exon 3 in mouse *Tulp3* using a pLenti-CRISPR Puromycin construct (Shalem *et al.*, 2014). Initial sequencing in controls and ko lines were performed on PCRs using primers flanking Exon 3 of *Tulp3*. We next performed TOPO cloning to determine the sequences of the allelic disruptions. Two IMCD3 *Tulp3* ko lines (#89 and #83) are shown. Rescue of cargo trafficking in line #89 is shown in Fig 2 and 4, and that in line #83 is shown in Figure S4D.
- (B) Immunoblotting of *Tulp3* ko cell lines and MEFs show lack of TULP3 without affecting ARL13B. Immunoblotting in IMCD3 *Tulp3* ko line #89 is shown in Figure 2.



A

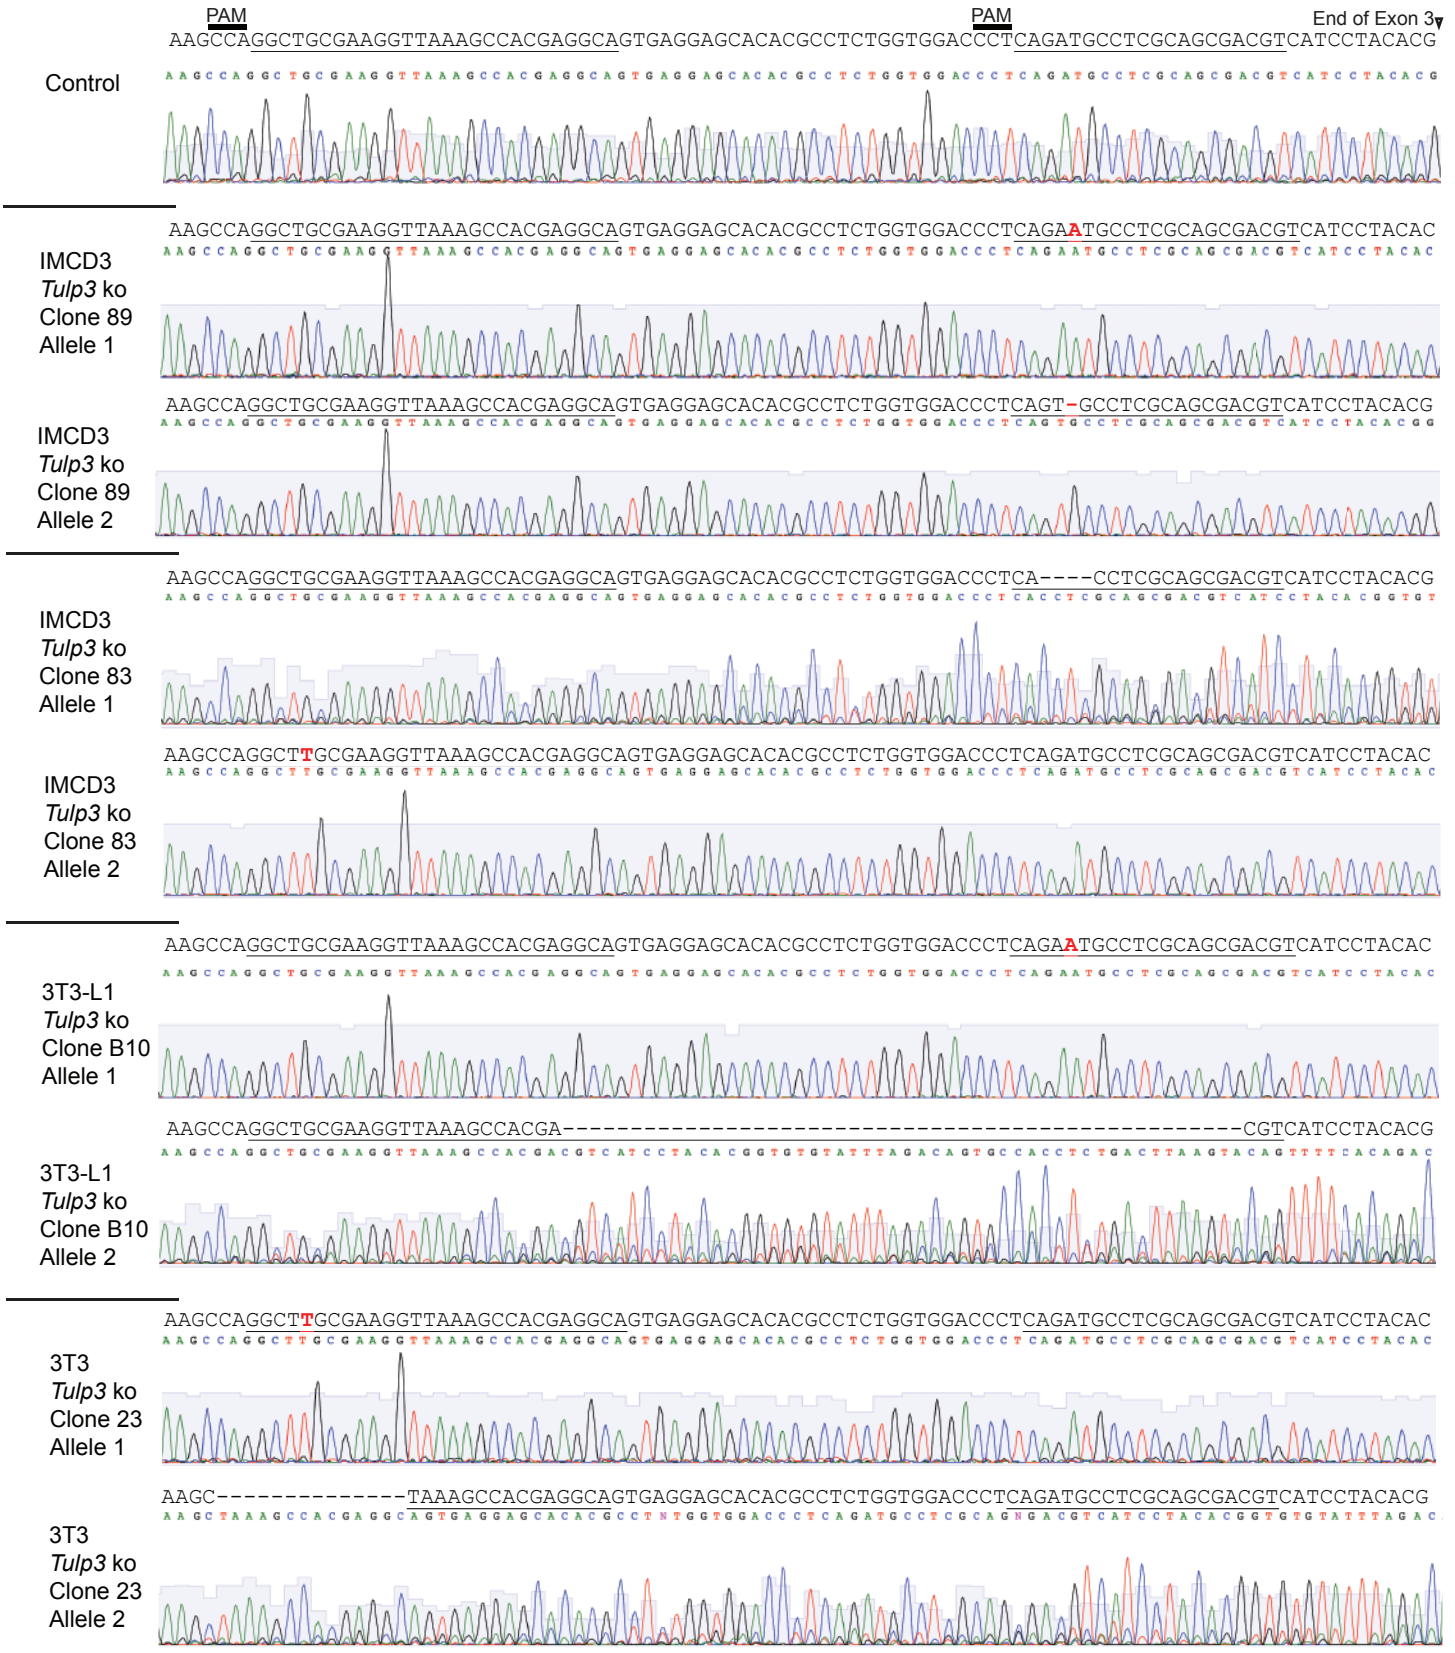

B

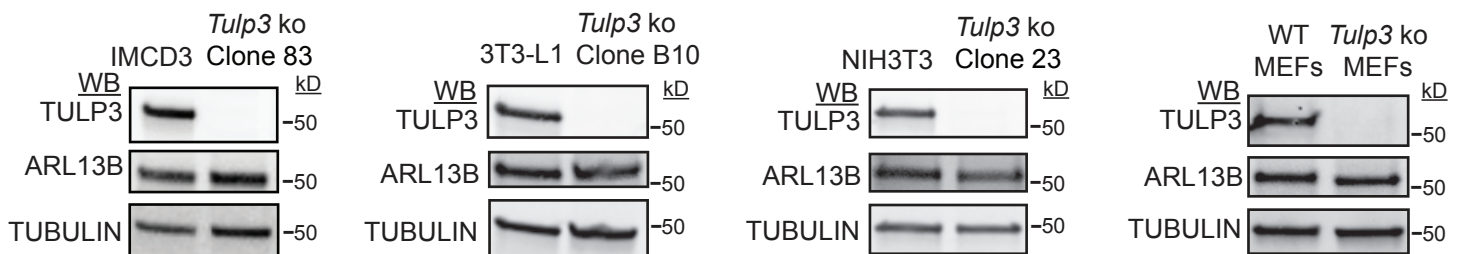

**Figure S3 (Related to Figure 1). Ciliary localization of ARL13B was unaffected in *Nestin-Cre; Tulp3<sup>fl/fl</sup>* brain regions.**

- (A) Brain sections from CA1 regions in hippocampus from either control or *Nestin-Cre; Tulp3<sup>fl/fl</sup>* mice at P7 were immunostained for ARL13B and AC3 and counterstained for DNA. Quantification shown in **Figure 1H**.
- (B) Cilia (AC3) positive cells were counted from CA1 regions in hippocampus and caudate-putamen (CPU) regions of brains from either control or *Nestin-Cre; Tulp3<sup>fl/fl</sup>* mice. Total counted cells were >200 from multiple fields from one mouse for control and two mice for *Nestin-Cre; Tulp3<sup>fl/fl</sup>*. Data represent mean  $\pm$  SD.
- (C) Representative images for Figure 1J.
- Scale, 5  $\mu$ m. ns, not significant.

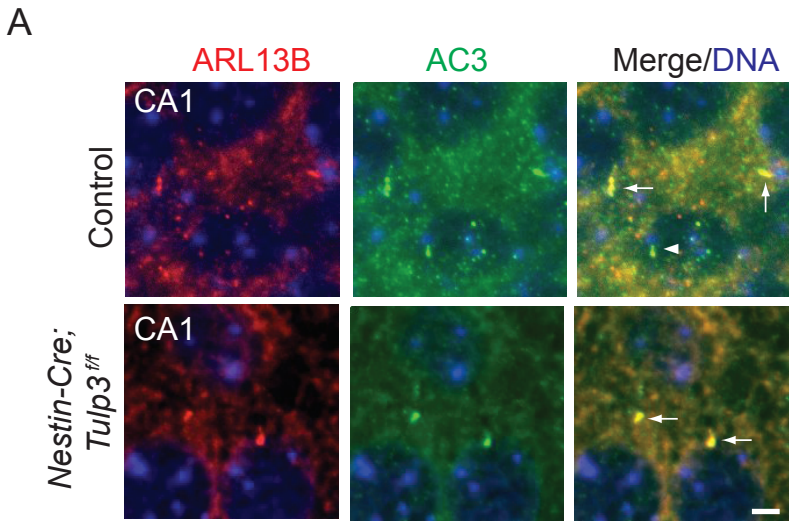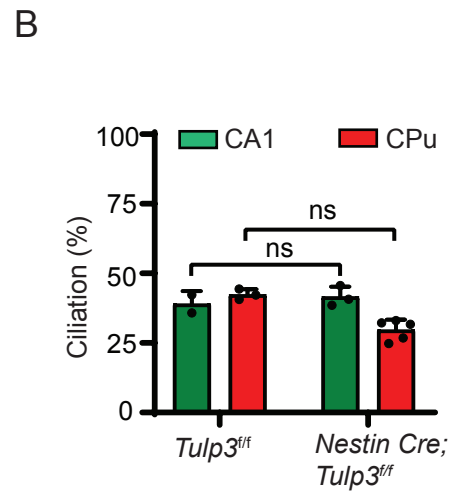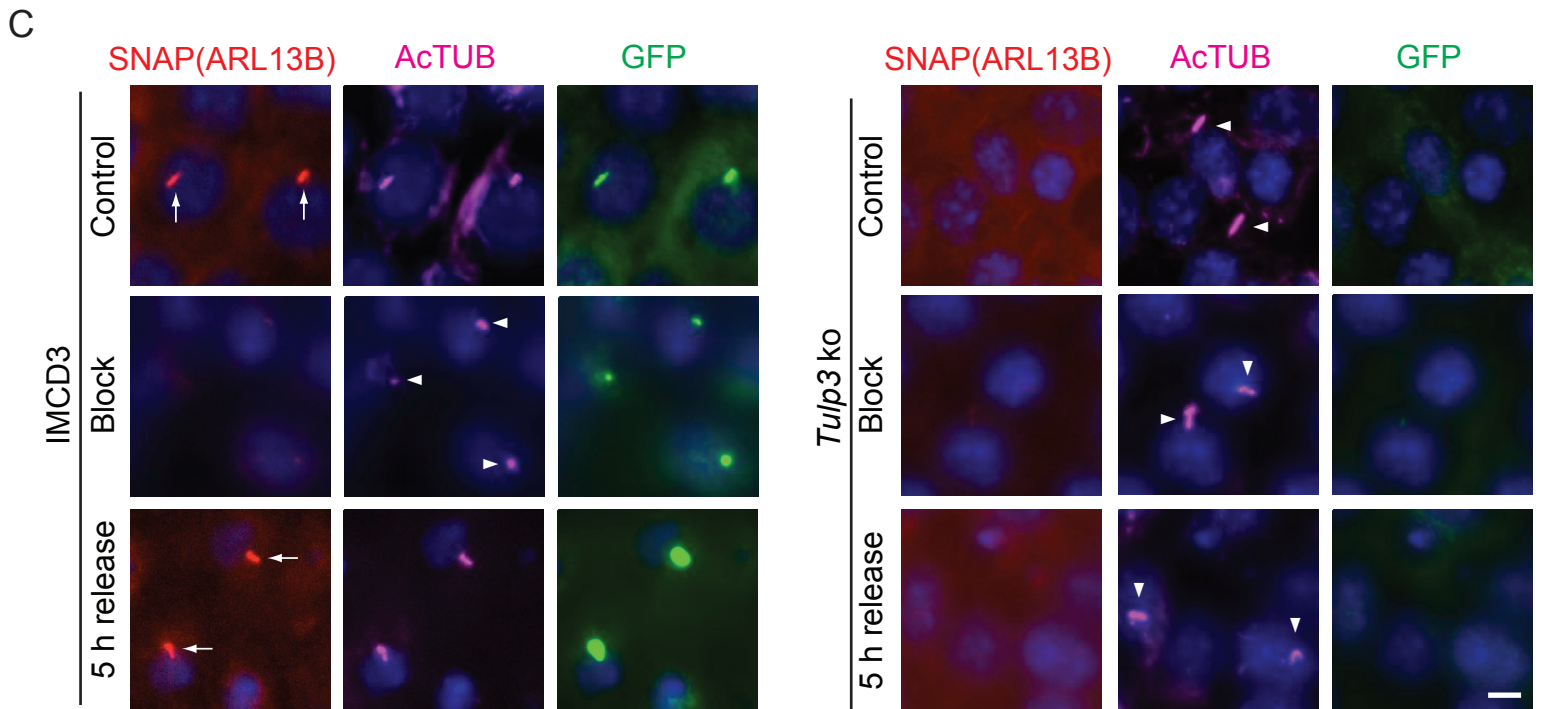

**Figure S4 (Related to Figure 2, 4, and 5). Tagged ARL13B is functional.**

- (A) N term- or C term-GFP-Stag (LAP) tagged ARL13B stably expressed in immortalized *Arl13b<sup>hmn</sup>* MEFs along with <sup>HA</sup>INPP5E were starved for 48 h and fixed. Fixed cells were immunostained for GFP (ARL13B), HA (INPP5E), acetylated tubulin (AcTUB) and counterstained for DNA. Both N- and C-tagged ARL13B fusions trafficked to cilia in *Arl13b<sup>hmn</sup>* background. <sup>HA</sup>INPP5E levels in cilia were also restored by either fusion, suggesting rescue from their stable expression.
- (B) Cells from (A) were counted from 3 experiments, and total counted cells are >100 for each condition.
- (C) Cilia (n>30) were counted for cilia lengths. Data represent mean  $\pm$  SD.
- (D) Rescue of ARL13B and GPR161 trafficking to cilia in IMCD3 *Tulp3* ko line #83 upon expressing <sup>LAP</sup>TULP3 WT. Cells from were counted from 2 experiments, and total counted cells are >200 for each condition. Rescue in IMCD3 *Tulp3* ko line #89 upon expressing <sup>LAP</sup>TULP3 WT is shown in Figure 4B.

Scale, 5  $\mu$ m. \*\*\*\*, p<0.0001; \*\*\*, p<0.001; ns, not significant.

A

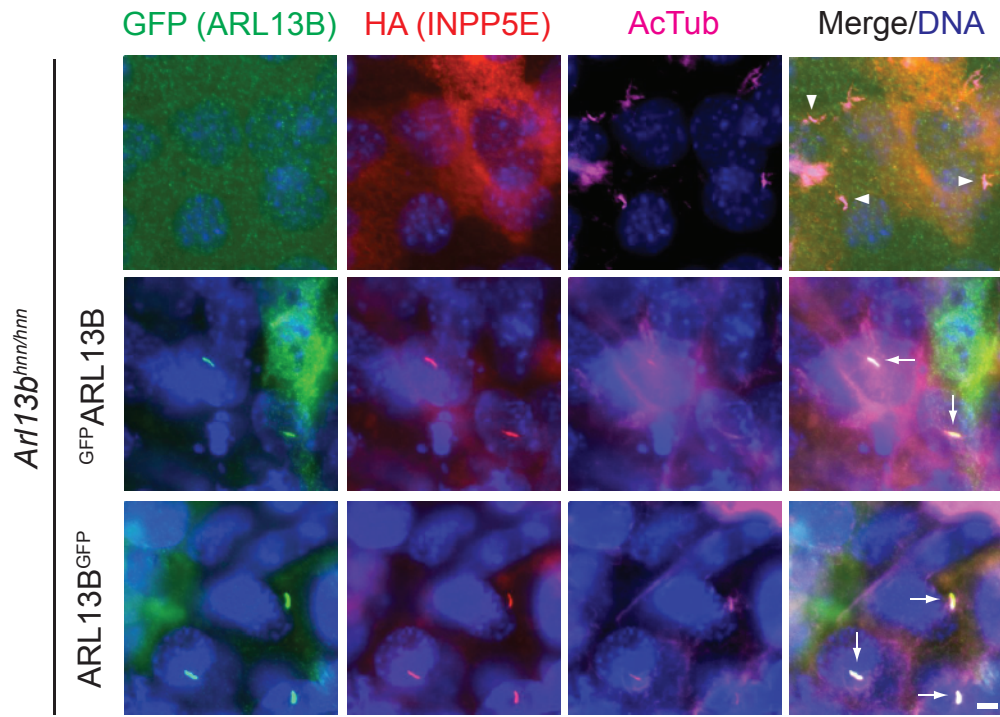

B

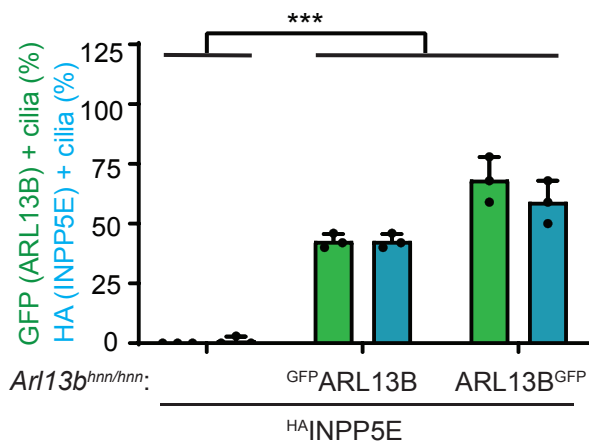

C

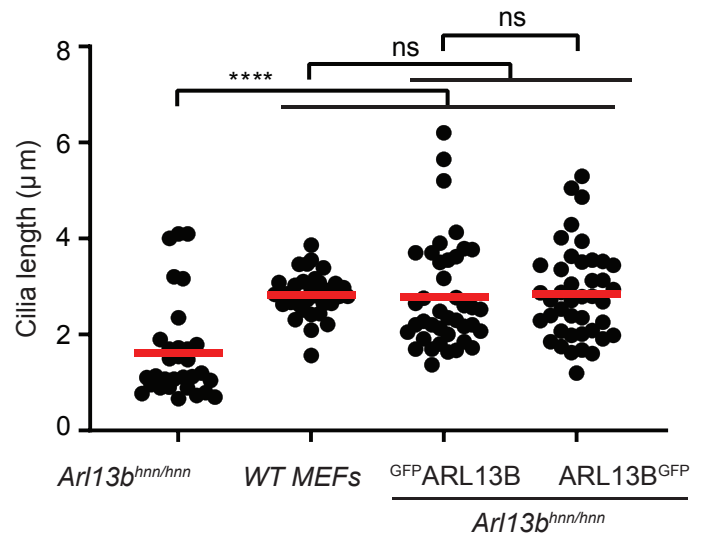

D

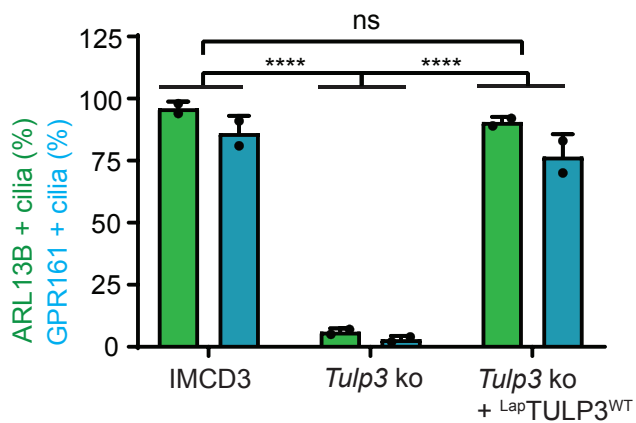

**Figure S5 (Related to Figure 3). TULP3 is required for trafficking of ARL13B and ARL13B-dependent lipidated cargoes to mouse kidney epithelial cilia.**

**(A)** Kidney sagittal sections at postnatal days 0 or 24 were immunostained for ARL13B, acetylated tubulin (AcTUB), Aquaporin 2 (AQP2) and counterstained for DNA. Asterisks refer to ARL13B immunostaining in cilia of adjacent tubules lacking AQP2. Scale, 50  $\mu$ m.

**(B)** Kidney sagittal sections at postnatal days 0 or 24 were immunostained for INPP5E, acetylated tubulin (AcTUB), and counterstained for DNA. Scale, 5  $\mu$ m.

Arrows and arrowheads indicate cilia positive and negative for the indicated proteins, respectively.

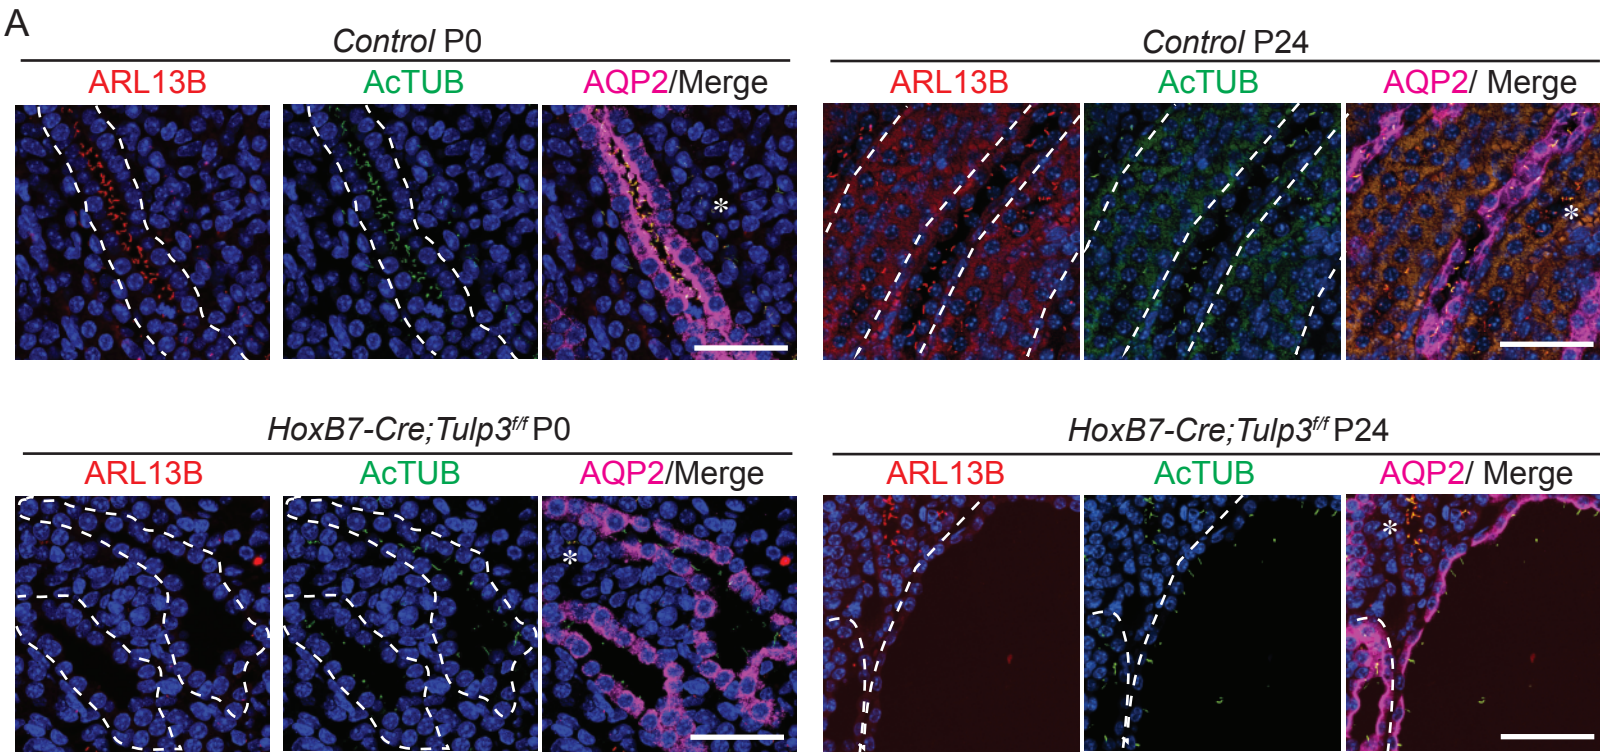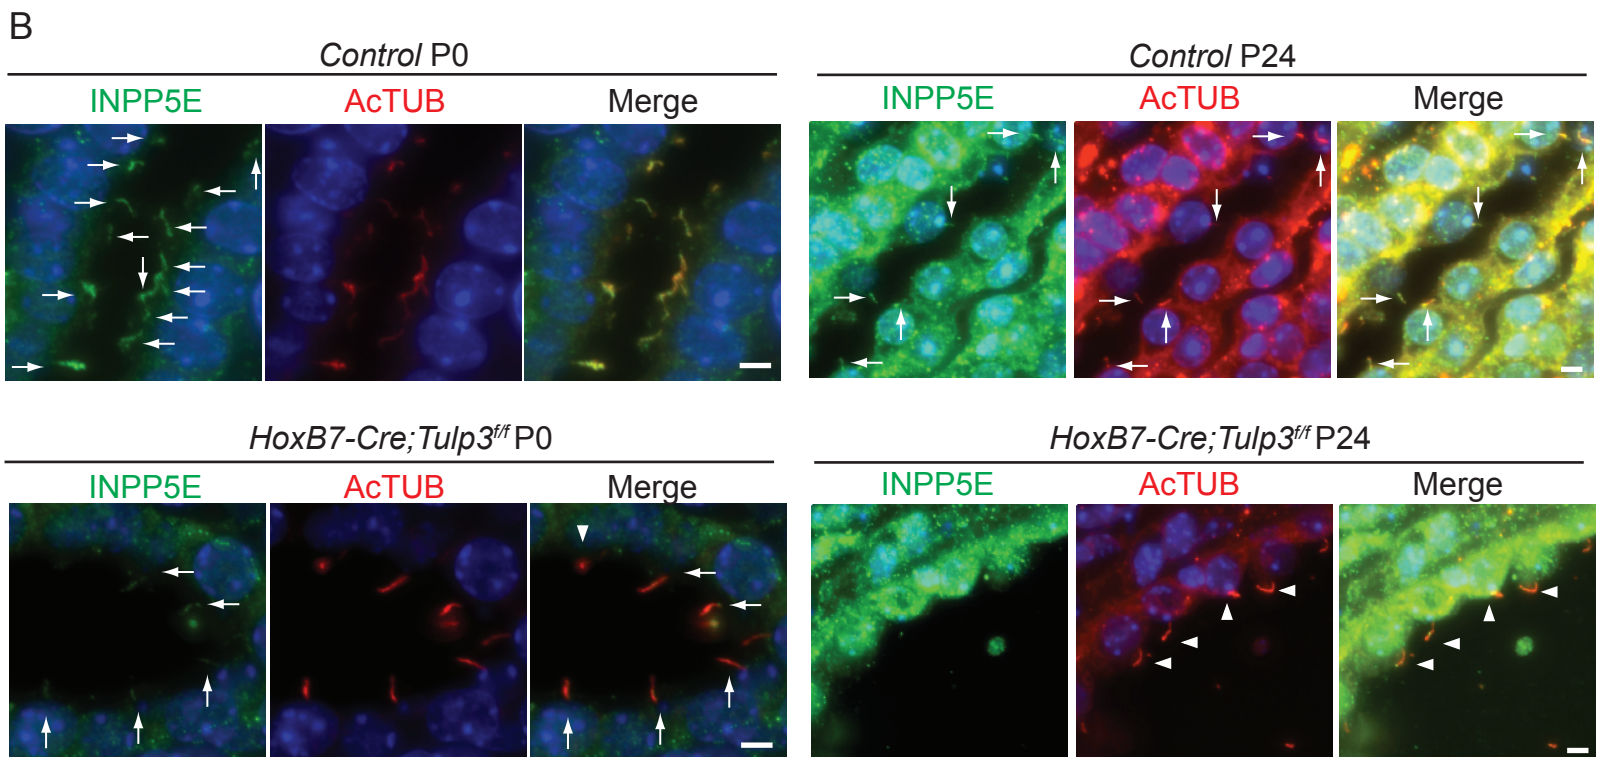

**Figure S6 (Related to Figure 5 and 6). ARL13B domains regulating TULP3 binding.**

- (A) Binding between GST, <sup>GST</sup>TULP3 or <sup>GST</sup>Tubby bound to Glutathione Sepharose beads and *in vitro* translated (IVT) Myc tagged ARL13B or ARL13B<sup>11A</sup> fragment as in Figure 6B.
- (B) Bacterially purified GST or <sup>GST</sup>TULP3 protein bound to glutathione Sepharose beads was incubated with *in vitro* translated (IVT) Myc tagged truncations of ARL13B in Lap150N buffer at room temperature for 1 h. Beads were washed, eluted and immunoblotted with Myc antibody to show interaction. Ponceau stain shows GST or <sup>GST</sup>TULP3 on beads. Input shows flowthrough immunoblotted with Myc antibody to show the presence of <sup>Myc</sup>ARL13B in the reaction. Lack of the coiled coil in ARL13B did not prevent <sup>GST</sup>TULP3 binding.
- (C) Binding between GST or <sup>GST</sup>TULP3 bound to Glutathione Sepharose beads and *in vitro* translated (IVT) Myc tagged ARL13B D2 or D2<sup>11A</sup> fragment as in Figure 6B.  
ns, not significant.



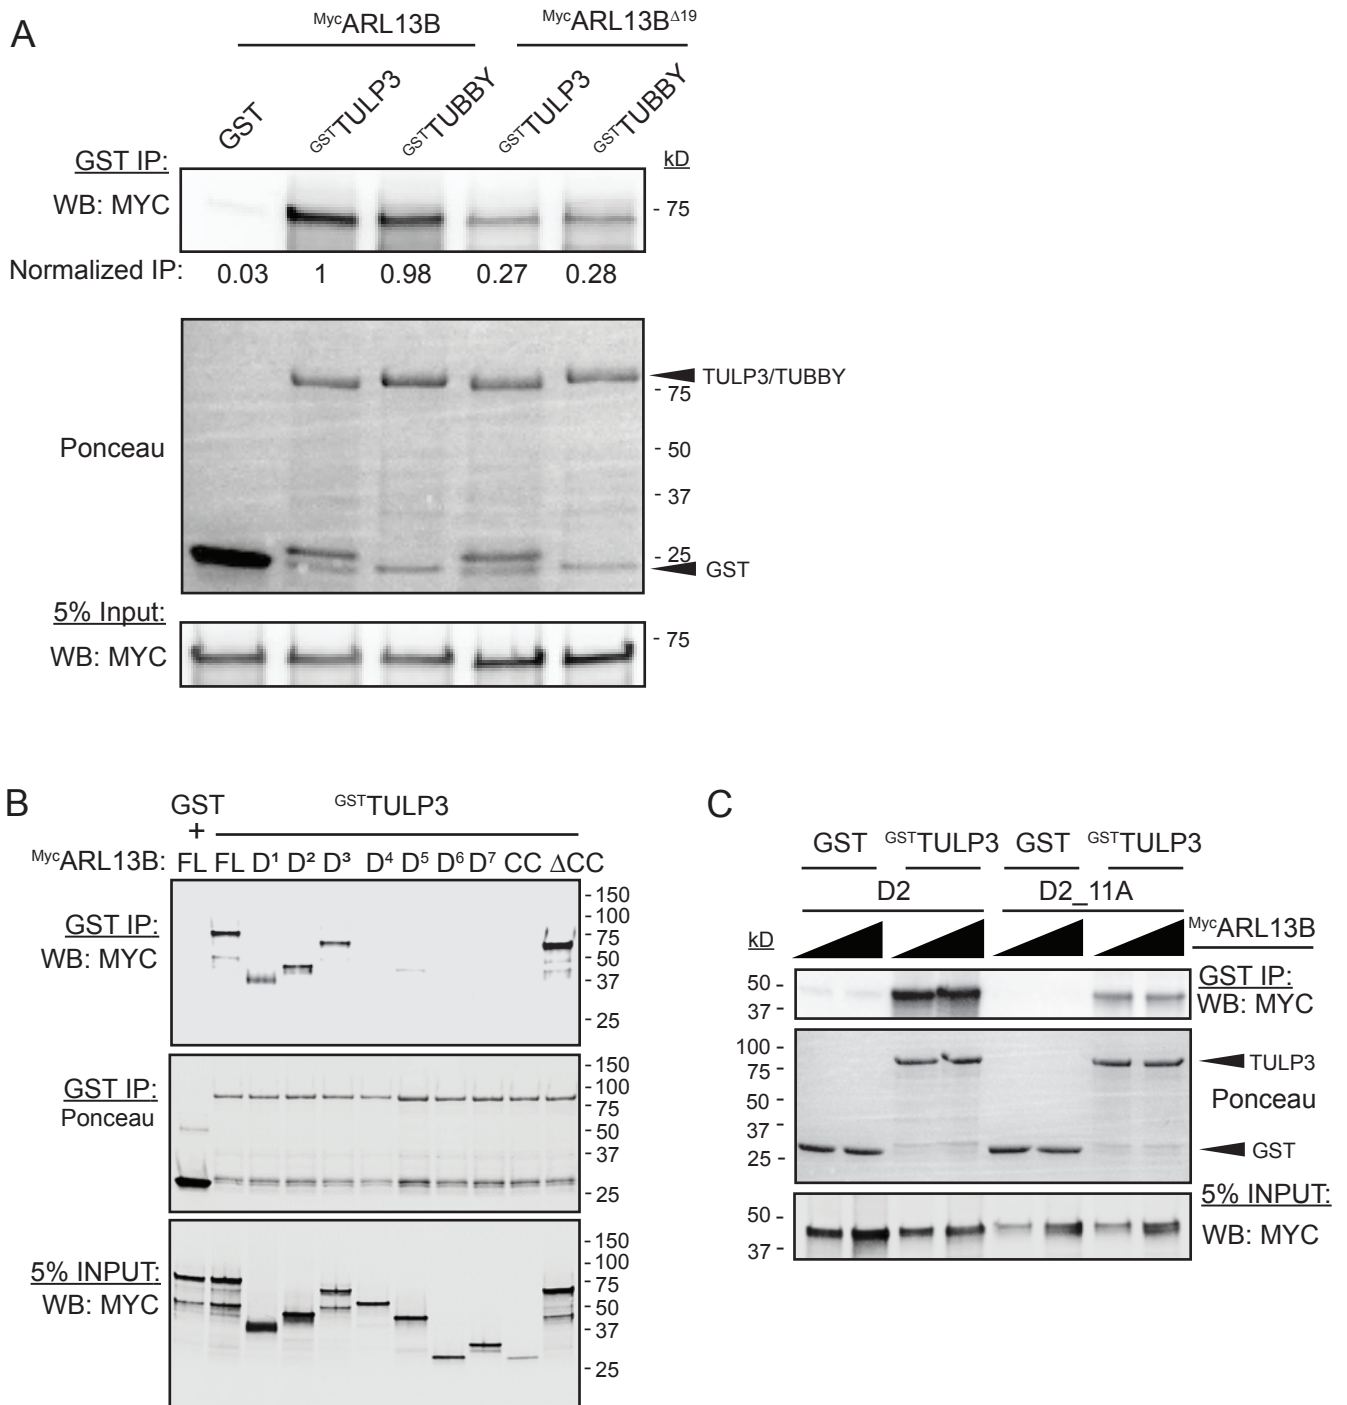

**Figure S7 (Related to Figure 7). ARL13B domains regulating TULP3 mediated ciliary trafficking.**

- (A) Immortalized *Arl13b*<sup>V358A/V35A</sup> MEFs were starved for 48 h and immunostained for Arl13b, acetylated tubulin (AcTub) and counterstained for DNA.
- (B) T-Rex 293 cells were co-transfected with BirA\* tagged TULP3 along with LAP tagged ARL13B or V359A mutant and processed as shown in Figure 5A. Mean  $\pm$  SD values indicate Biotin/S-tag ratios normalized to CD8 inker control. “n” indicates the number of experiments performed
- (C) Bacterially purified GST or <sup>GST</sup>TULP3 protein bound to glutathione Sepharose beads was tested for binding with *in vitro* translated (IVT) Myc full length ARL13B and V359A mutant as in Figure 5D.
- (D) *Arl13b*<sup>hmn</sup> cells stably expressing C-LAP tagged D1 or D5 were serum starved for 48 h before fixing and immunostained for GFP, HA, acetylated tubulin (AcTUB) and counterstained for DNA.

Scale, 5  $\mu$ m. Arrows indicate cilia positive for ARL13B fragments/variants (B), while arrowheads indicate cilia negative for the respective proteins.

A

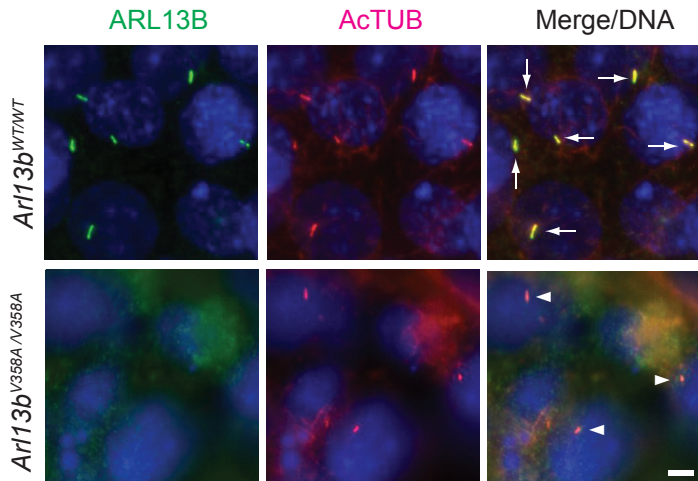

B

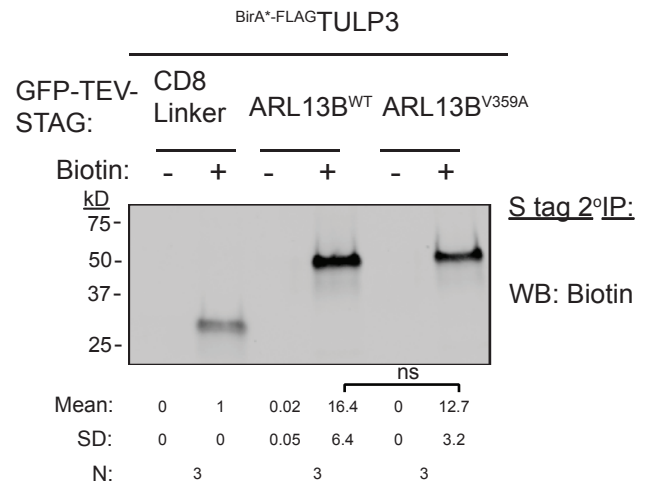

C

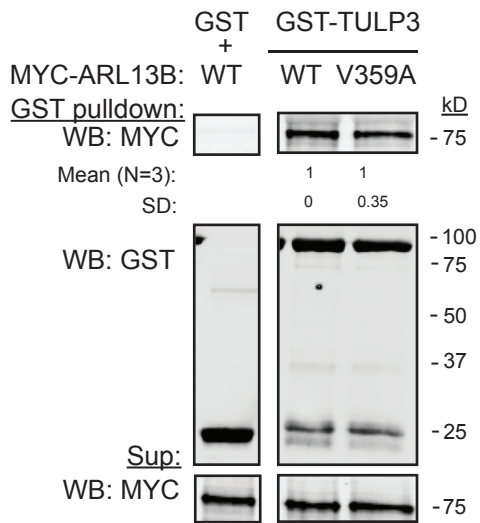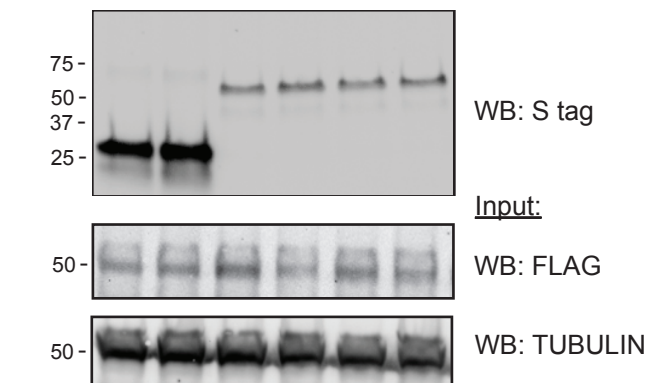

D

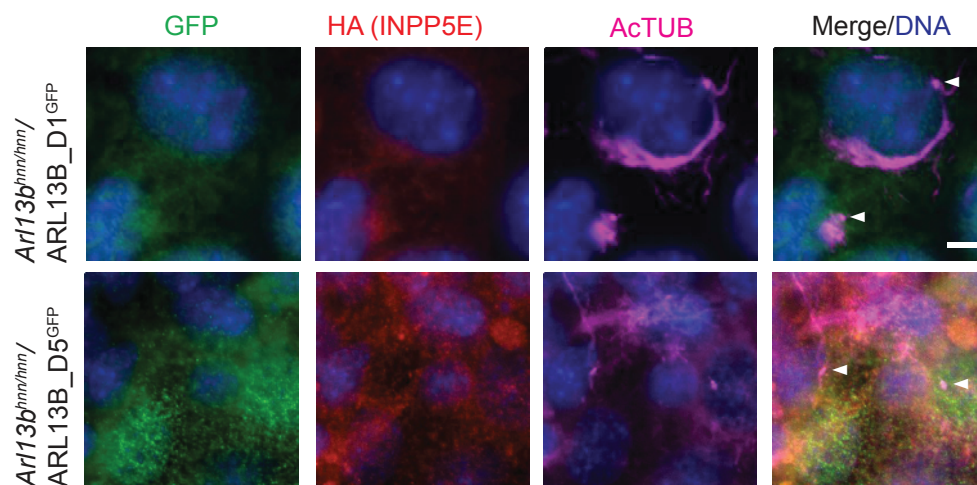

Supplement: mbc-34-ar18-s001.pdf [file mbc-34-ar18-s001.pdf]
